# Supplementary material for: Myeloma Genome Project Panel is a Comprehensive Targeted Genomics Panel for Molecular Profiling of Patients with Multiple Myeloma
Source: PubMed Central journal article supplement — Clin Cancer Res. 2022 May 6;28(13):2854–64. doi: 10.1158/1078-0432.CCR-21-3695 (PMC9250632; doi:10.1158/1078-0432.ccr-21-3695), 2022-05-06

**Supplementary Figure 1: Overview of genomic markers on the MGP Panel. Mutations in blue, translocations in red, and copy number alterations in red.**

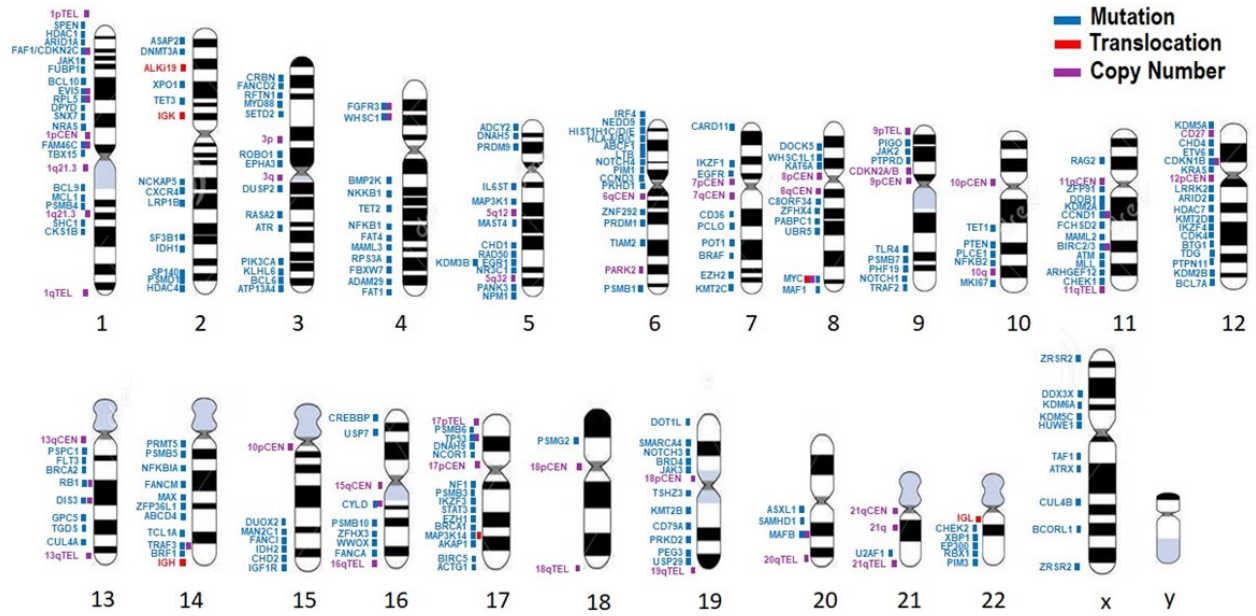

Supplement: NIHMS1808009-supplement-2.pdf [file NIHMS1808009-supplement-2.pdf]
