# Supplementary material for: Myeloma Genome Project Panel is a Comprehensive Targeted Genomics Panel for Molecular Profiling of Patients with Multiple Myeloma
Source: PubMed Central journal article supplement — Clin Cancer Res. 2022 May 6;28(13):2854–64. doi: 10.1158/1078-0432.CCR-21-3695 (PMC9250632; doi:10.1158/1078-0432.ccr-21-3695), 2022-05-06

**Supplementary Figure 3.** Comparison of VAF in somatic mutations in 16 samples processed on v1 and v2.1. The VAF of 59 variants was compared in the same 16 samples between versions 1 and 2.1 of the panel. The correlation coefficient was  $R^2=0.9817$ . This indicates good reproducibility of data between the versions of the panel.

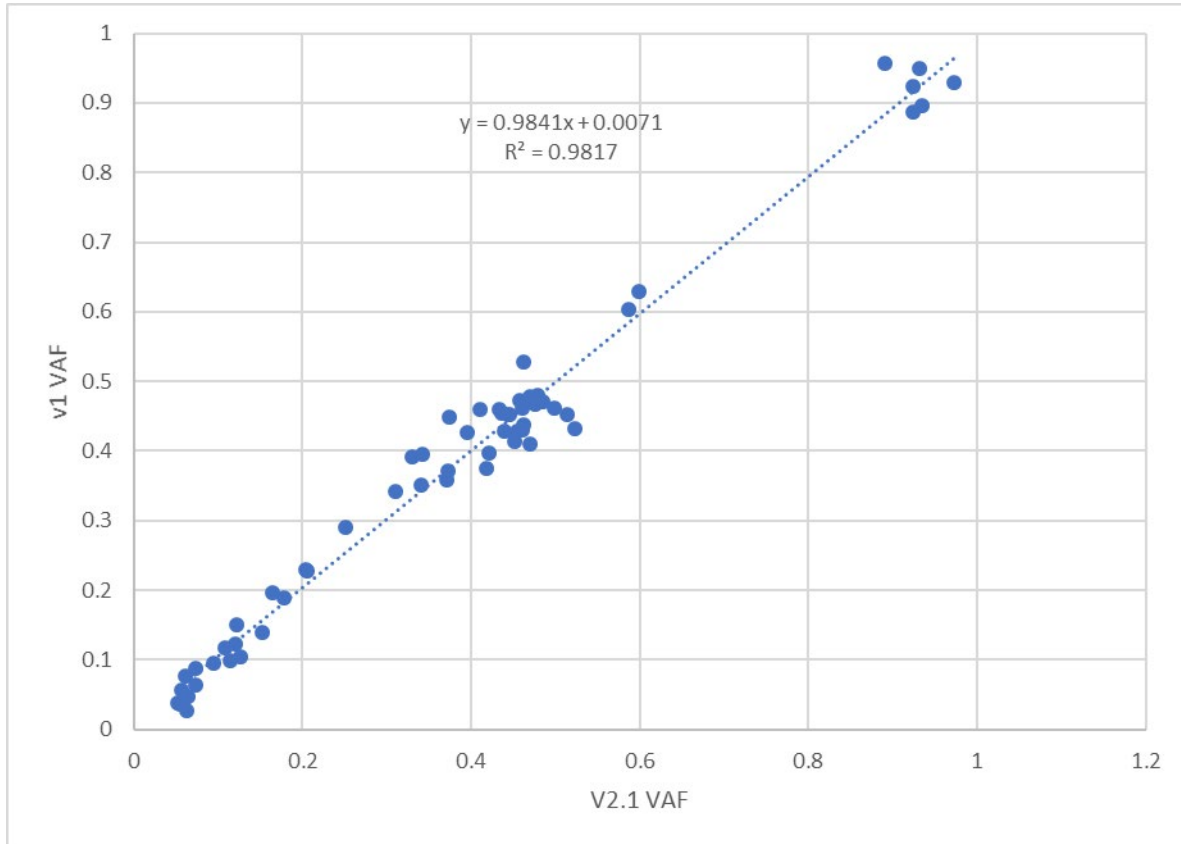

Supplement: NIHMS1808009-supplement-4.pdf [file NIHMS1808009-supplement-4.pdf]
