# Supplementary material for: Myeloma Genome Project Panel is a Comprehensive Targeted Genomics Panel for Molecular Profiling of Patients with Multiple Myeloma
Source: PubMed Central journal article supplement — Clin Cancer Res. 2022 May 6;28(13):2854–64. doi: 10.1158/1078-0432.CCR-21-3695 (PMC9250632; doi:10.1158/1078-0432.ccr-21-3695), 2022-05-06

**Supplementary Figure 4.** Comparison of MLPA and panel copy number data in selected multiple myeloma cell lines.

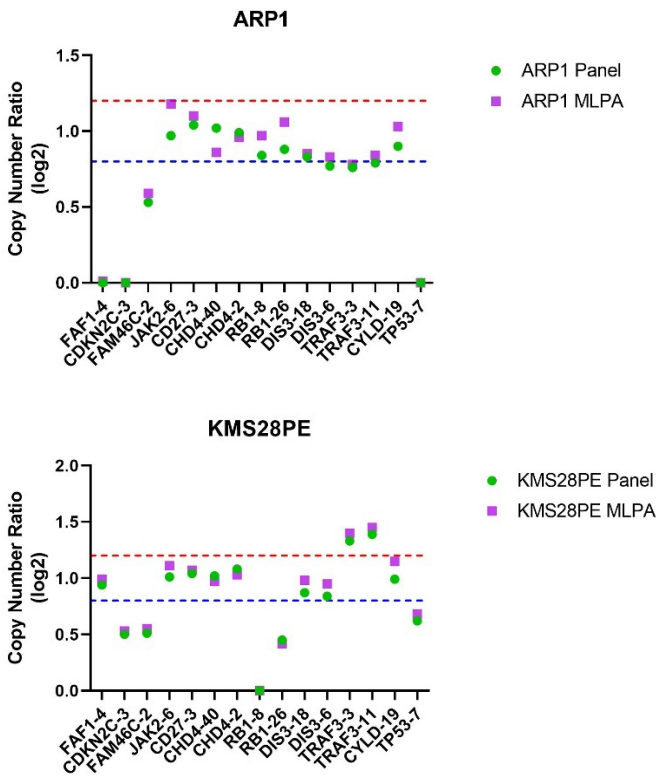

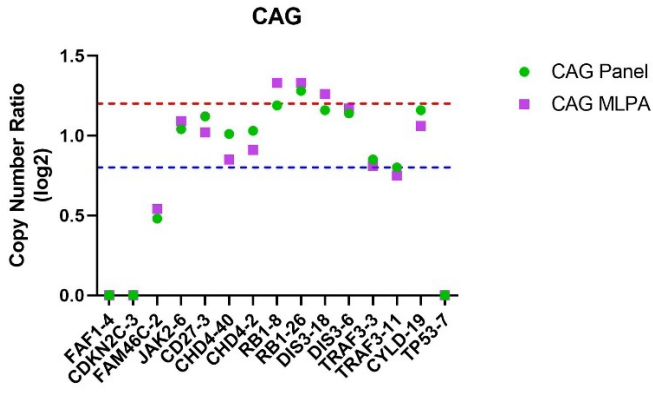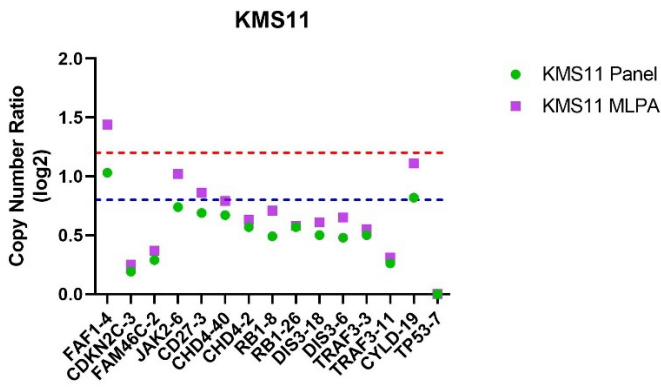

Supplement: NIHMS1808009-supplement-5.pdf [file NIHMS1808009-supplement-5.pdf]
