# Supplementary material for: Myeloma Genome Project Panel is a Comprehensive Targeted Genomics Panel for Molecular Profiling of Patients with Multiple Myeloma
Source: PubMed Central journal article supplement — Clin Cancer Res. 2022 May 6;28(13):2854–64. doi: 10.1158/1078-0432.CCR-21-3695 (PMC9250632; doi:10.1158/1078-0432.ccr-21-3695), 2022-05-06

**Supplementary Figure 5.** Examples of copy number abnormalities and SNP allele frequencies in proximity to *MYC* at 8q24. *MYC* is located in the green block. Copy number and SNP profiles do not align along the x-axis.

- A. A sample with a deletion and a gain of chromosomal material telomeric of *MYC*. The gain is situated in a region that also has a t(2;8) with the IgK locus.

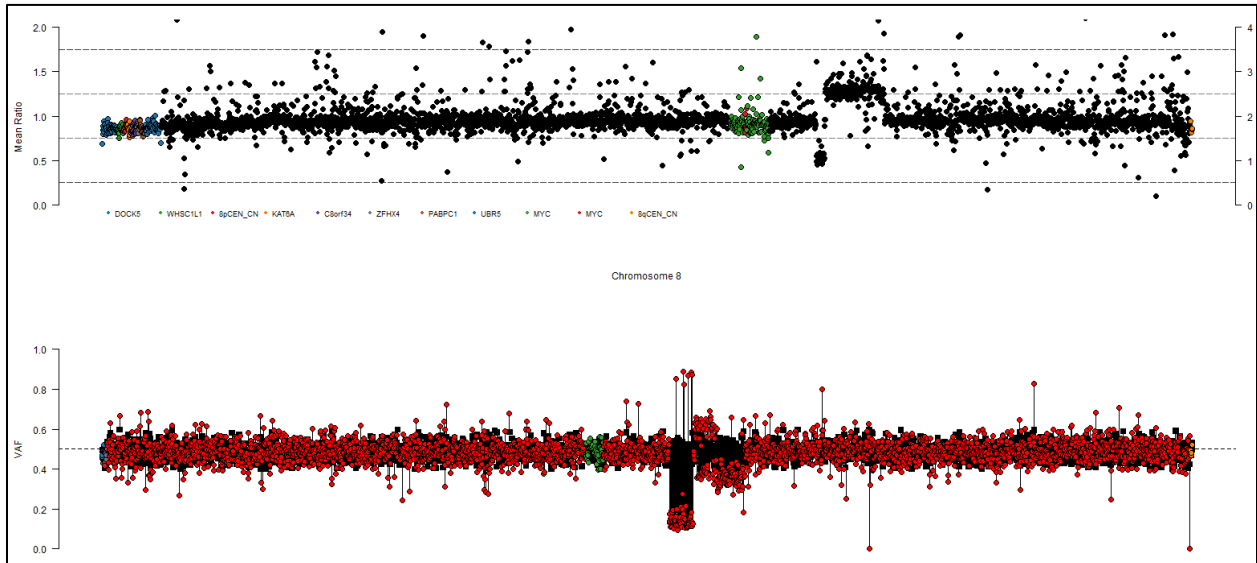

- B. A sample with two deletion events centromeric of *MYC* caused by two translocation events (shown as arcs).

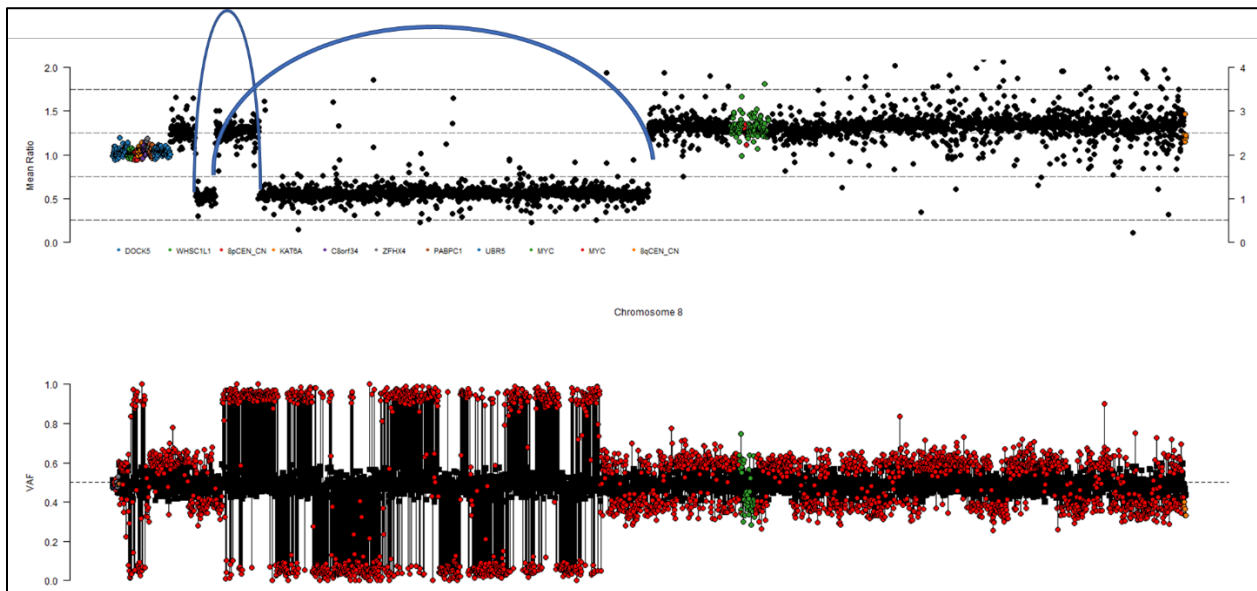

- C. Gain of copy number at the *MYC* locus with translocation breakpoints detected at either end of the gained segment resulting in a t(1;8) and insertion of *MYC* at the *FAM46C* locus.

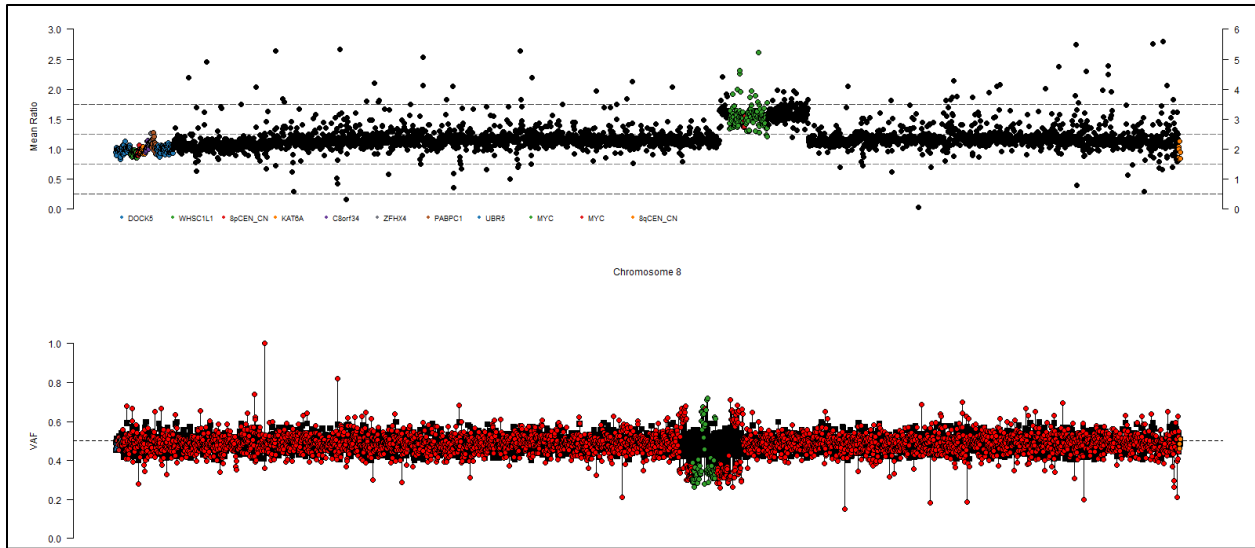

- D. Gain of copy number telomeric of *MYC* with translocation breakpoints detected at either end of the gained segment resulting in a t(8;22) to the IgL locus.

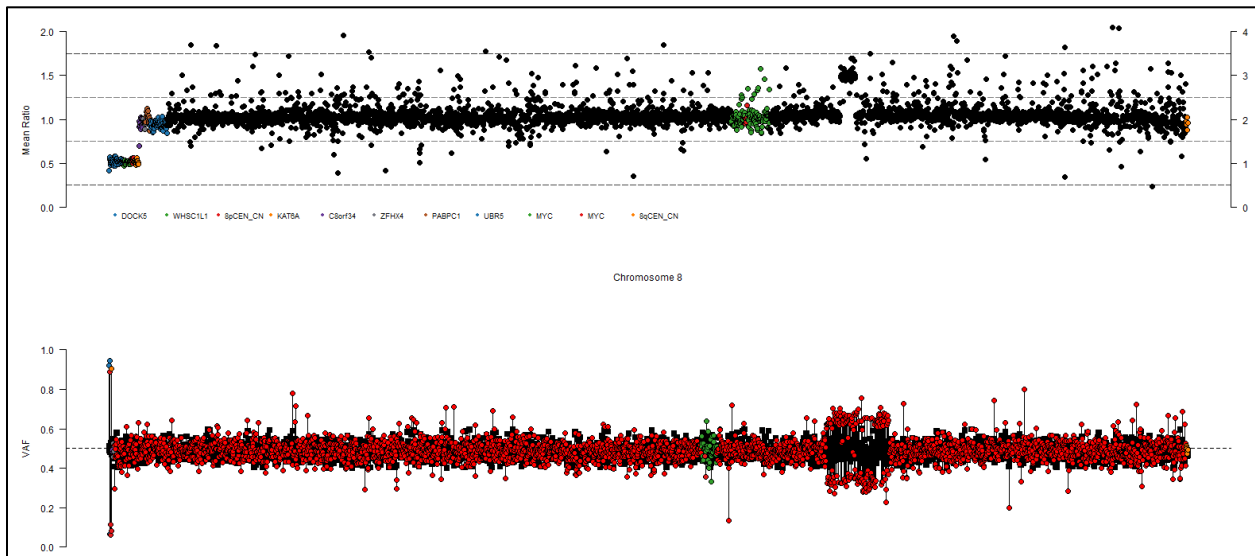

- E. A deletion event telomeric of *NSMCE2* and centromeric of *MYC*, placing *MYC* next to the super-enhancer of *NSMCE2*.

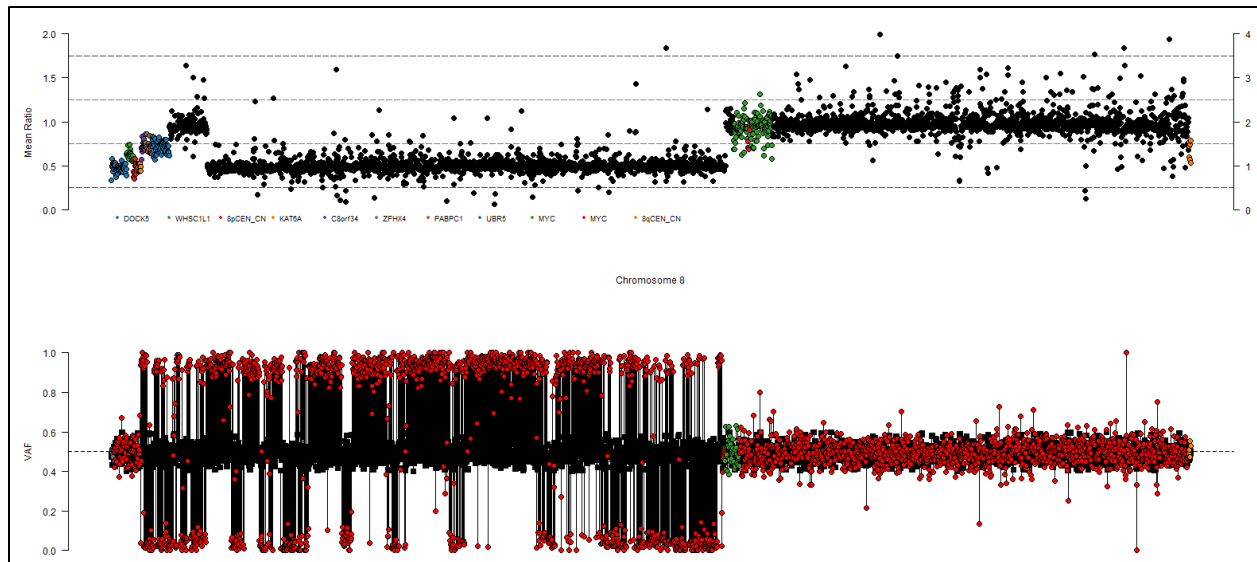

Supplement: NIHMS1808009-supplement-6.pdf [file NIHMS1808009-supplement-6.pdf]
