# Supplementary material for: Myeloma Genome Project Panel is a Comprehensive Targeted Genomics Panel for Molecular Profiling of Patients with Multiple Myeloma
Source: PubMed Central journal article supplement — Clin Cancer Res. 2022 May 6;28(13):2854–64. doi: 10.1158/1078-0432.CCR-21-3695 (PMC9250632; doi:10.1158/1078-0432.ccr-21-3695), 2022-05-06

**Supplementary Figure 6.** Detection of interstitial copy number loss in KDM6A/UTX in three patient samples. UTX was previously identified as deleted in MM cell lines (van Haften Nature 2009), and has been shown to sensitize cells to EZH2 inhibition (Ezponda Cell Reports 2017).

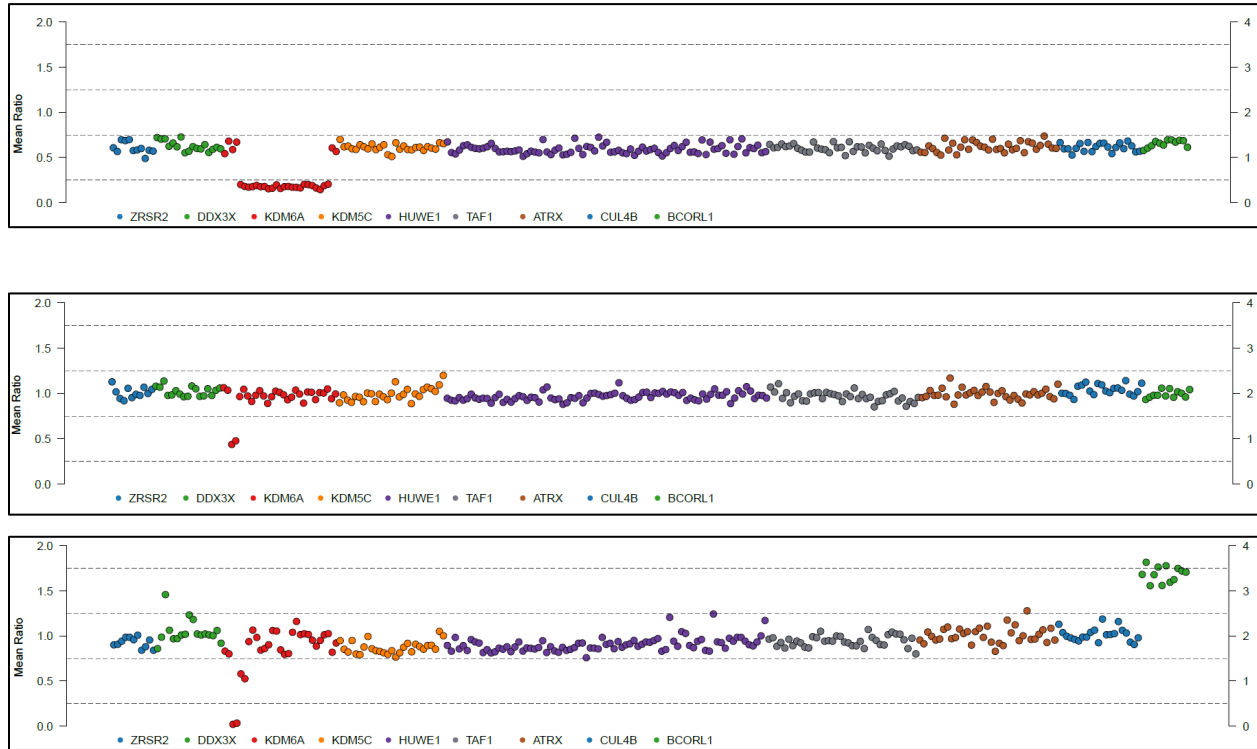

Supplement: NIHMS1808009-supplement-7.pdf [file NIHMS1808009-supplement-7.pdf]
