# Supplementary material for: Myeloma Genome Project Panel is a Comprehensive Targeted Genomics Panel for Molecular Profiling of Patients with Multiple Myeloma
Source: PubMed Central journal article supplement — Clin Cancer Res. 2022 May 6;28(13):2854–64. doi: 10.1158/1078-0432.CCR-21-3695 (PMC9250632; doi:10.1158/1078-0432.ccr-21-3695), 2022-05-06

**Supplementary Figure 10.** Detection of trisomies in the genome level view of Tarpan. Gains in individual chromosomes can be seen to get an overview of hyperdiploidy. In the top case, whole gains of chromosomes 7, 9, 15, and 19 as well as arm level gains of chromosomes 3, 4, and 5 are seen. In the bottom example, gains of chromosomes 3, 5, 7, 9, 15, 18, and 19 are seen.

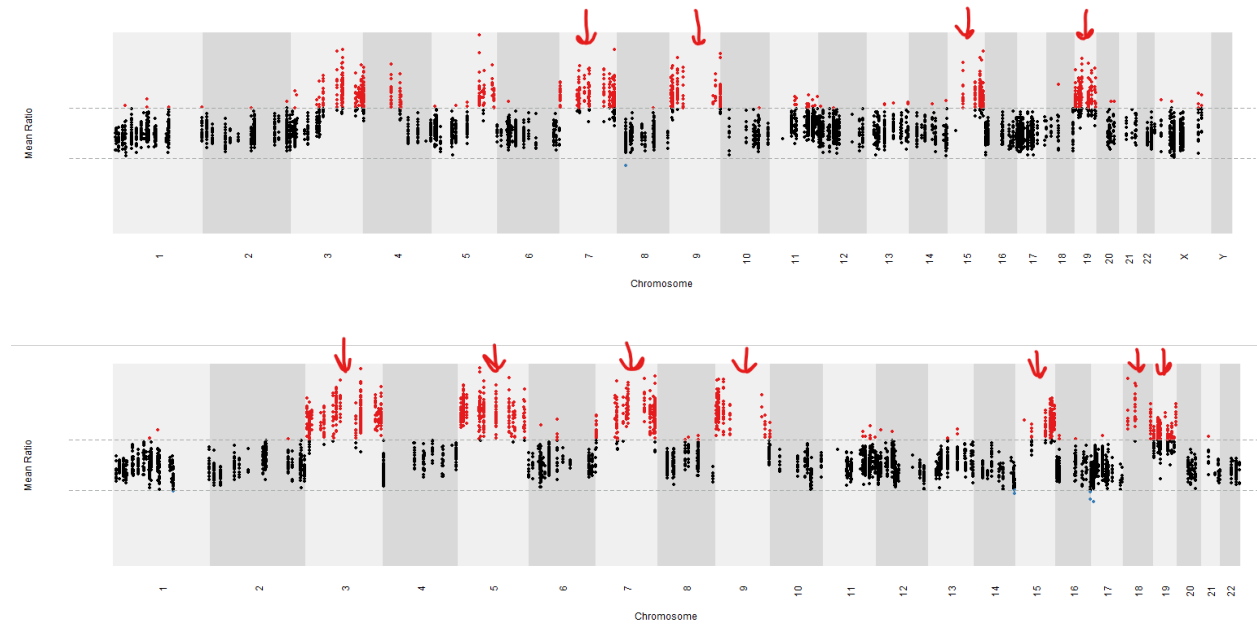

Supplement: NIHMS1808009-supplement-11.pdf [file NIHMS1808009-supplement-11.pdf]
