# Supplementary material for: Myeloma Genome Project Panel is a Comprehensive Targeted Genomics Panel for Molecular Profiling of Patients with Multiple Myeloma
Source: PubMed Central journal article supplement — Clin Cancer Res. 2022 May 6;28(13):2854–64. doi: 10.1158/1078-0432.CCR-21-3695 (PMC9250632; doi:10.1158/1078-0432.ccr-21-3695), 2022-05-06
Supplement: NIHMS1808009-supplement-12.pdf [file NIHMS1808009-supplement-12.pdf]

*Supplementary Table 1: Panel Design, Gene Mutations*

|          |         |          |          |         |        |         |         |
|----------|---------|----------|----------|---------|--------|---------|---------|
| ABCD4    | BTG1    | DOT1L    | HIST1H1D | LRRK2   | PANK3  | PTPRD   | TP53    |
| ABCF1    | C8orf34 | DPYD     | HIST1H1E | LTB     | PARK2  | RAD50   | TRAF2   |
| ACTG1    | CARD11  | DUSP2    | HIST1H1E | MAF     | PCLO   | RAG2    | TRAF3   |
| ADAM29   | CCND1   | DUOX2    | HLA-A    | MAFB    | PEG3   | RASA2   | TSHZ3   |
| ADCY2    | CCND3   | EGFR     | HLA-B    | MAML2   | PIGO   | RB1     | U2AF1   |
| AKAP1    | CD36    | EGR1     | HLA-C    | MAML3   | PIK3CA | RBX1    | UBR5    |
| ARHGEF12 | CD79A   | EP300    | HUWE1    | MAN2C1  | PIM1   | RFTN1   | USP29   |
| ARID1A   | CDK4    | EPHA3    | IDH1     | MAP3K1  | PIM3   | ROBO1   | USP7    |
| ARID2    | CDKN1B  | ETV6     | IDH2     | MAP3K14 | PKHD1  | RPL5    | WHSC1   |
| ASAP2    | CDKN2A  | EVI5     | IGF1R    | MAST4   | PLCE1  | RPS3A   | WHSC1L1 |
| ASXL1    | CDKN2B  | EZH1     | IKZF1    | MAX     | POT1   | SAMHD1  | WWOX    |
| ATM      | CDKN2C  | EZH2     | IKZF3    | MCL1    | PRDM1  | SETD2   | XBP1    |
| ATP13A4  | CHD1    | FAF1     | IKZF4    | MKI67   | PRDM9  | SF3B1   | XPO1    |
| ATR      | CHD2    | FAM46C   | IL6ST    | MLL     | PRKD2  | SHC1    | ZFHX3   |
| ATRX     | CHD4    | FANCA    | IRF4     | MYC     | PRMT5  | SMARCA4 | ZFHX4   |
| BCL10    | CHEK1   | FANCD2   | JAK1     | MYD88   | PSMB1  | SNX7    | ZFP36L1 |
| BCL6     | CHEK2   | FANCI    | JAK2     | NCKAP5  | PSMB10 | SP140   | ZNF292  |
| BCL7A    | CKS1B   | FANCM    | JAK3     | NCOR1   | PSMB11 | SPEN    | ZRSR2   |
| BCL9     | CRBN    | FAT1     | KAT6A    | NEDD9   | PSMB2  | STAT3   |         |
| BCORL1   | CREBBP  | FAT4     | KDM2B    | NF1     | PSMB3  | TAF1    |         |
| BIRC2    | CUL4A   | FBXW7    | KDM3B    | NFKB1   | PSMB4  | TBX15   |         |
| BIRC3    | CUL4B   | FCHSD2   | KDM5A    | NFKB2   | PSMB6  | TCL1A   |         |
| BIRC5    | CXCR4   | FGFR3    | KDM5C    | NFKBIA  | PSMB7  | TDG     |         |
| BMP2K    | CYLD    | FLT3     | KDM6A    | NOTCH1  | PSMB8  | TET1    |         |
| BRAF     | DDB1    | FUBP1    | KLHL6    | NOTCH3  | PSMD1  | TET2    |         |
| BRCA1    | DDX3X   | GPC5     | KMT2B    | NOTCH4  | PSMG2  | TET3    |         |
| BRCA2    | DIS3    | HDAC1    | KMT2C    | NPM1    | PSPC1  | TGDS    |         |
| BRD4     | DNAH5   | HDAC4    | KMT2D    | NR3C1   | PTEN   | TIAM2   |         |
| ABCD4    | DNMT3A  | HDAC7    | KRAS     | NRAS    | PTPN11 | TLR4    |         |
| BRF1     | DOCK5   | HIST1H1C | LRP1B    | PABPC1  | PSMD1  | TET3    |         |
