# Supplementary material for: Myeloma Genome Project Panel is a Comprehensive Targeted Genomics Panel for Molecular Profiling of Patients with Multiple Myeloma
Source: PubMed Central journal article supplement — Clin Cancer Res. 2022 May 6;28(13):2854–64. doi: 10.1158/1078-0432.CCR-21-3695 (PMC9250632; doi:10.1158/1078-0432.ccr-21-3695), 2022-05-06
Supplement: NIHMS1808009-supplement-13.pdf [file NIHMS1808009-supplement-13.pdf]

*Supplementary Table 2: Panel Design, Copy Number Variations*

| <b>SN</b> | <b>Loci</b> | <b>SN</b> | <b>Loci</b> |
|-----------|-------------|-----------|-------------|
| <b>1</b>  | 1pCEN_CN    | <b>29</b> | 20qTEL_CN   |
| <b>2</b>  | 1pTEL_CN    | <b>30</b> | 21qCEN_CN   |
| <b>3</b>  | 1q21.3_CN   | <b>31</b> | 21qTEL_CN   |
| <b>4</b>  | 1qTEL_CN    | <b>32</b> | 21q_CN      |
| <b>5</b>  | 3p_CN       | <b>33</b> | CCND1_CN    |
| <b>6</b>  | 3q_CN       | <b>34</b> | BIRC2_CN    |
| <b>7</b>  | 5q12_CN     | <b>35</b> | BIRC3_CN    |
| <b>8</b>  | 5q32_CN     | <b>36</b> | CCND3_CN    |
| <b>9</b>  | 6qCEN_CN    | <b>37</b> | CD27_CN     |
| <b>10</b> | 7pCEN_CN    | <b>38</b> | CDKN1B_CN   |
| <b>11</b> | 8pCEN_CN    | <b>39</b> | CDKN2A_CN   |
| <b>12</b> | 8qCEN_CN    | <b>40</b> | CDKN2B_CN   |
| <b>13</b> | 9pCEN_CN    | <b>41</b> | CDKN2C_CN   |
| <b>14</b> | 9pTEL_CN    | <b>42</b> | CYLD_CN     |
| <b>15</b> | 10pCN       | <b>43</b> | DIS3_CN     |
| <b>16</b> | 10qCN       | <b>44</b> | EVI5_CN     |
| <b>17</b> | 11qCEN_CN   | <b>45</b> | FAF1_CN     |
| <b>18</b> | 11qTEL_CN   | <b>46</b> | FAM46C_CN   |
| <b>19</b> | 12pCEN_CN   | <b>47</b> | FGFR3_CN    |
| <b>20</b> | 13qCEN_CN   | <b>48</b> | IDH2_CN     |
| <b>21</b> | 13qTEL_CN   | <b>49</b> | MAFB_CN     |
| <b>22</b> | 15qCEN_CN   | <b>50</b> | MYC_CN      |
| <b>23</b> | 16qCEN_CN   | <b>51</b> | PARK2_CN    |
| <b>24</b> | 16qTEL_CN   | <b>52</b> | RB1_CN      |
| <b>25</b> | 18qTEL_CN   | <b>53</b> | RPL5_CN     |
| <b>26</b> | 18qCEN_CN   | <b>54</b> | TP53_CN     |
| <b>27</b> | 19pCEN_CN   | <b>55</b> | TRAF3_CN    |
| <b>28</b> | 19qTEL_CN   | <b>56</b> | WHSC1_CN    |
