# Supplementary material for: Myeloma Genome Project Panel is a Comprehensive Targeted Genomics Panel for Molecular Profiling of Patients with Multiple Myeloma
Source: PubMed Central journal article supplement — Clin Cancer Res. 2022 May 6;28(13):2854–64. doi: 10.1158/1078-0432.CCR-21-3695 (PMC9250632; doi:10.1158/1078-0432.ccr-21-3695), 2022-05-06
Supplement: NIHMS1808009-supplement-14.pdf [file NIHMS1808009-supplement-14.pdf]

*Supplementary Table 3: Panel Design, Translocations*

| <b>SN</b> | <b>Genes</b> | <b>SN</b> | <b>Genes</b> |
|-----------|--------------|-----------|--------------|
| 1         | ALKi9        | 4         | IGH          |
| 2         | IGK          | 5         | IGL          |
| 3         | MYC          | 6         | MAP3K14      |
