# Supplementary material for: Myeloma Genome Project Panel is a Comprehensive Targeted Genomics Panel for Molecular Profiling of Patients with Multiple Myeloma
Source: PubMed Central journal article supplement — Clin Cancer Res. 2022 May 6;28(13):2854–64. doi: 10.1158/1078-0432.CCR-21-3695 (PMC9250632; doi:10.1158/1078-0432.ccr-21-3695), 2022-05-06
Supplement: NIHMS1808009-supplement-15.pdf [file NIHMS1808009-supplement-15.pdf]

**Supplementary Table 4. Mutations detected in DNA standards (Horizon Diagnostics).**

| Test  | Chr     | Gene          | Variant     |
|-------|---------|---------------|-------------|
| HD734 | 7p12    | <i>EGFR</i>   | T790M       |
| HD734 | 3q26.3  | <i>PIK3CA</i> | E545K       |
| HD734 | 7p12    | <i>EGFR</i>   | ΔE746-A750  |
| HD734 | 1p13.2  | <i>NRAS</i>   | Q61L        |
| HD734 | 1p13.2  | <i>NRAS</i>   | Q61H        |
| HD734 | 7p12    | <i>EGFR</i>   | L858R       |
| HD734 | 7p12    | <i>EGFR</i>   | L861Q       |
| HD734 | 13q12   | <i>FLT3</i>   | D835Y       |
| HD734 | 9p24    | <i>JAK2</i>   | V617F       |
| HD734 | 12p12.1 | <i>KRAS</i>   | G12C        |
| HD734 | 12p12.1 | <i>KRAS</i>   | G12R        |
| HD734 | 12p12.1 | <i>KRAS</i>   | G12S        |
| HD734 | 1p13.2  | <i>NRAS</i>   | Q61K        |
| HD734 | 1p13.2  | <i>NRAS</i>   | Q61R        |
| HD734 | 12p12.1 | <i>KRAS</i>   | Q61H        |
| HD734 | 12p12.1 | <i>KRAS</i>   | G12A        |
| HD734 | 12p12.1 | <i>KRAS</i>   | G12D        |
| HD734 | 13q12   | <i>FLT3</i>   | ΔI836       |
| HD734 | 3q26.3  | <i>PIK3CA</i> | E542K       |
| HD734 | 2q33.3  | <i>IDH1</i>   | R132C       |
| HD734 | 2q33.3  | <i>IDH1</i>   | R132H       |
| HD734 | 12p12.1 | <i>KRAS</i>   | Q61L        |
| HD734 | 12p12.1 | <i>KRAS</i>   | A146T       |
| HD734 | 12p12.1 | <i>KRAS</i>   | G12V        |
| HD728 | 7q34    | <i>BRAF</i>   | V600K       |
| HD734 | 7q34    | <i>BRAF</i>   | V600G       |
| HD734 | 15q26.1 | <i>IDH2</i>   | R140Q       |
| HD734 | 15q26.1 | <i>IDH2</i>   | R172K       |
| HD730 | 7p12    | <i>EGFR</i>   | ΔE746-A750  |
| HD730 | 7q34    | <i>BRAF</i>   | V600M       |
| HD734 | 7q34    | <i>BRAF</i>   | V600M       |
| HD829 | 2p23.3  | <i>DNMT3A</i> | R882C       |
| HD829 | 2q33.3  | <i>IDH1</i>   | R132C       |
| HD829 | 9p24    | <i>JAK2</i>   | V617F       |
| HD730 | 12p12.1 | <i>KRAS</i>   | A146T       |
| HD728 | 13q12   | <i>FLT3</i>   | ΔI836       |
| HD829 | 9p24    | <i>JAK2</i>   | F537-K539>L |
| HD730 | 3q26.3  | <i>PIK3CA</i> | E542K       |
| HD728 | 7p12    | <i>EGFR</i>   | T790M       |
| HD728 | 1p13.2  | <i>NRAS</i>   | Q61K        |
| HD730 | 2q33.3  | <i>IDH1</i>   | R132H       |
| HD829 | 7q36.1  | <i>EZH2</i>   | R418Q       |

|       |          |               |        |
|-------|----------|---------------|--------|
| HD728 | 9p24     | <i>JAK2</i>   | V617F  |
| HD728 | 12p12.1  | <i>KRAS</i>   | G12A   |
| HD728 | 9q34.3   | <i>NOTCH1</i> | L1600P |
| HD829 | 15q26.1  | <i>IDH2</i>   | R172K  |
| HD730 | 13q12    | <i>FLT3</i>   | D835Y  |
| HD730 | 1p13.2   | <i>NRAS</i>   | Q61H   |
| HD728 | 2q33.3   | <i>IDH1</i>   | R132C  |
| HD728 | 12p12.1  | <i>KRAS</i>   | G12R   |
| HD829 | 20q11.21 | <i>ASXL1</i>  | W796C  |
| HD829 | 13q12.2  | <i>FLT3</i>   | D835Y  |
| HD829 | 4q24     | <i>TET2</i>   | R1261H |
| HD829 | 17p13.1  | <i>TP53</i>   | S241F  |
| HD730 | 12p12.1  | <i>KRAS</i>   | G12S   |
| HD829 | 2q33.1   | <i>SF3B1</i>  | G740E  |
| HD730 | 7q34     | <i>BRAF</i>   | V600E  |
| HD752 | 7q34     | <i>BRAF</i>   | V600E  |
| HD829 | 1p13.2   | <i>NRAS</i>   | Q61L   |
| HD728 | 7q34     | <i>BRAF</i>   | V600E  |
| HD734 | 7q34     | <i>BRAF</i>   | V600E  |
| HD728 | 7p12     | <i>EGFR</i>   | G719S  |
| HD730 | 7p12     | <i>EGFR</i>   | G719S  |
| HD734 | 7p12     | <i>EGFR</i>   | G719S  |
| HD752 | 7p12     | <i>EGFR</i>   | G719S  |
| HD752 | 12p12.1  | <i>KRAS</i>   | G13D   |
| HD734 | 12p12.1  | <i>KRAS</i>   | G13D   |
| HD728 | 12p12.1  | <i>KRAS</i>   | G13D   |
| HD730 | 12p12.1  | <i>KRAS</i>   | G13D   |
| HD730 | 3q26.3   | <i>PIK3CA</i> | H1047R |
| HD728 | 3q26.3   | <i>PIK3CA</i> | H1047R |
| HD734 | 3q26.3   | <i>PIK3CA</i> | H1047R |
| HD752 | 3q26.3   | <i>PIK3CA</i> | H1047R |
