# Supplementary material for: Myeloma Genome Project Panel is a Comprehensive Targeted Genomics Panel for Molecular Profiling of Patients with Multiple Myeloma
Source: PubMed Central journal article supplement — Clin Cancer Res. 2022 May 6;28(13):2854–64. doi: 10.1158/1078-0432.CCR-21-3695 (PMC9250632; doi:10.1158/1078-0432.ccr-21-3695), 2022-05-06
Supplement: NIHMS1808009-supplement-16.pdf [file NIHMS1808009-supplement-16.pdf]

**Supplementary Table 5. Comparison of MLPA and NGS copy number determination for common regions of interest in 13 MM cell lines.**

| Gene-Exon | ARP1 | CAG  | JIM3 | JJN3 | KMM1 | KMS11 | KMS28PE | MM1S | OCIMY5 | RPM18226 | SACH1 | U266 | XG-1 |         |
|-----------|------|------|------|------|------|-------|---------|------|--------|----------|-------|------|------|---------|
| FAF1-4    | 0    | 0    | 0.28 | 1.48 | 0.66 | 1.03  | 0.94    | 0.51 | 0      | 0        | 0.64  | 0.86 | 0.87 | 94.20%  |
| FAF1_4    | 0.01 | 0.00 | 0.36 | 1.23 | 0.78 | 1.44  | 0.99    | 0.55 | 0.00   | 0.00     | 0.62  | 0.93 | 0.96 |         |
| CDKN2C-3  | 0    | 0    | 0.33 | 1.26 | 0.72 | 0.19  | 0.5     | 0    | 0      | 0        | 0.6   | 0.77 | 0.83 | 100.00% |
| CDKN2C_2  | 0.00 | 0.00 | 0.36 | 1.05 | 0.71 | 0.25  | 0.53    | 0.00 | 0.00   | 0.00     | 0.50  | 0.78 | 0.69 |         |
| FAM46C-2  | 0.53 | 0.48 | 0.62 | 1.77 | 0.56 | 0.29  | 0.51    | 0.57 | 0.56   | 0.71     | 0.66  | 0.86 | 0.72 | 100.00% |
| FAM46C_1  | 0.59 | 0.54 | 0.68 | 1.57 | 0.55 | 0.37  | 0.55    | 0.63 | 0.57   | 0.76     | 0.58  | 0.91 | 0.87 |         |
| JAK2-6    | 0.97 | 1.04 | 0.62 | 0.93 | 0.79 | 0.74  | 1.01    | 1.02 | 1.42   | 0.8      | 0.61  | 0.75 | 1.15 | 100.00% |
| JAK2_6    | 1.18 | 1.09 | 0.81 | 0.83 | 0.94 | 1.02  | 1.11    | 1.13 | 1.25   | 0.68     | 0.60  | 0.91 | 1.12 |         |
| CD27-3    | 1.04 | 1.12 | 1.03 | 0.95 | 1.12 | 0.69  | 1.04    | 1.09 | 1.03   | 1.47     | 0.85  | 0.81 | 1.05 | 100.00% |
| CD27_CN_3 | 1.10 | 1.02 | 1.03 | 0.78 | 1.03 | 0.86  | 1.07    | 1.03 | 1.09   | 1.12     | 0.88  | 0.91 | 0.96 |         |
| CHD4-40   | 1.02 | 1.01 | 0.95 | 0.97 | 1.09 | 0.67  | 1.02    | 1.04 | 1.03   | 1.11     | 1.01  | 0.97 | 0.91 | 100.00% |
| CHD4_40   | 0.86 | 0.85 | 0.80 | 0.69 | 0.91 | 0.79  | 0.97    | 0.93 | 0.92   | 0.92     | 0.76  | 0.91 | 0.71 |         |
| CHD4-2    | 0.99 | 1.03 | 0.8  | 1.03 | 0.96 | 0.57  | 1.08    | 1.12 | 0.99   | 1.13     | 0.98  | 0.99 | 0.83 | 100.00% |
| CHD4_2    | 0.96 | 0.91 | 0.89 | 0.74 | 1.05 | 0.63  | 1.03    | 1.02 | 1.05   | 1.10     | 0.79  | 0.86 | 0.84 |         |
| RBI-8     | 0.84 | 1.19 | 0.61 | 0.97 | 0.6  | 0.49  | 0       | 0.52 | 0.92   | 0.76     | 1.1   | 0.54 | 0.52 | 100.00% |
| RBI_8     | 0.97 | 1.33 | 0.89 | 0.89 | 0.69 | 0.71  |         | 0.61 | 0.59   | 0.64     | 1.19  | 0.61 | 0.49 |         |
| RBI-26    | 0.88 | 1.28 | 0.65 | 0.99 | 0.6  | 0.57  | 0.45    | 0.56 | 1.05   | 0.67     | 1.28  | 0.58 | 0.5  | 100.00% |
| RBI_26    | 1.06 | 1.33 | 0.80 | 1.02 | 0.67 | 0.58  | 0.42    | 0.60 | 0.57   | 0.65     | 1.01  | 0.69 | 0.58 |         |
| DIS3-18   | 0.83 | 1.16 | 0.57 | 0.9  | 0.59 | 0.5   | 0.87    | 0.5  | 0.96   | 0.79     | 1.23  | 1.03 | 0.52 | 100.00% |
| DIS3_18   | 0.85 | 1.26 | 0.69 | 0.76 | 0.53 | 0.61  | 0.98    | 0.55 | 0.80   | 0.81     | 1.12  | 1.20 | 0.53 |         |
| DIS3-6    | 0.77 | 1.14 | 0.58 | 0.86 | 0.57 | 0.48  | 0.94    | 0.49 | 0.9    | 0.99     | 1.08  | 0.91 | 0.58 | 100.00% |
| DIS3_6    | 0.83 | 1.17 | 0.65 | 0.76 | 0.60 | 0.65  | 0.95    | 0.51 | 0.70   | 0.71     | 1.03  | 1.08 | 0.50 |         |
| TRAF3-3   | 0.76 | 0.85 | 0.6  | 0.95 | 1.3  | 0.5   | 1.33    | 0.53 | 1.79   | 0.92     | 0.86  | 0.78 | 0.83 | 100.00% |
| TRAF3_3   | 0.78 | 0.81 | 0.57 | 0.77 | 1.26 | 0.55  | 1.40    | 0.50 | 1.94   | 0.73     | 0.86  | 0.87 | 0.72 |         |
| TRAF3-11  | 0.79 | 0.8  | 0.58 | 0.94 | 1.32 | 0.26  | 1.39    | 0.53 | 1.83   | 0        | 0.88  | 0.78 | 0.96 | 100.00% |
| TRAF3_11  | 0.84 | 0.75 | 0.59 | 0.73 | 1.16 | 0.31  | 1.45    | 0.43 | 1.93   | 0.00     | 0.79  | 0.79 | 0.72 |         |
| CYLD-19   | 0.9  | 1.16 | 0.91 | 0.99 | 0.99 | 0.82  | 0.99    | 1.01 | 0.47   | 1.66     | 0.61  | 0.89 | 0.99 | 100.00% |
| CYLD_19   | 1.03 | 1.06 | 1.14 | 0.81 | 1.12 | 1.11  | 1.15    | 1.15 | 0.54   | 1.67     | 0.62  | 0.98 | 0.98 |         |
| TP53-7    | 0    | 0    | 0.35 | 0.5  | 0.69 | 0     | 0.62    | 1.05 | 0.74   | 0.93     | 0.57  | 0.53 | 1.16 | 100.00% |
| TP53_7    | 0.00 |      | 0.34 | 0.41 | 0.55 | 0.00  | 0.68    | 0.99 | 0.76   | 0.73     | 0.56  | 0.55 | 0.97 |         |
| Average   |      |      |      |      |      |       |         |      |        |          |       |      |      | 99.61%  |
