# Supplementary material for: Myeloma Genome Project Panel is a Comprehensive Targeted Genomics Panel for Molecular Profiling of Patients with Multiple Myeloma
Source: PubMed Central journal article supplement — Clin Cancer Res. 2022 May 6;28(13):2854–64. doi: 10.1158/1078-0432.CCR-21-3695 (PMC9250632; doi:10.1158/1078-0432.ccr-21-3695), 2022-05-06
Supplement: NIHMS1808009-supplement-17.pdf [file NIHMS1808009-supplement-17.pdf]

*Supplementary Table 6: Comparison of Targeted sequencing and WGS copy number data for CDKN2C.*

| CDKN2C |   | WGS |   |     |   |   |
|--------|---|-----|---|-----|---|---|
|        |   | 0   | 1 | 2   | 3 | 4 |
| Panel  | 0 | 1   | 3 |     |   |   |
|        | 1 |     | 7 |     |   |   |
|        | 2 |     |   | 101 |   |   |
|        | 3 |     |   |     | 1 |   |
|        | 4 |     |   |     |   |   |

| CDKN2C |              | WGS      |              |
|--------|--------------|----------|--------------|
|        |              | Deletion | Not Deletion |
| Panel  | Deletion     | 11       | 0            |
|        | Not Deletion | 0        | 102          |
