# Supplementary material for: Myeloma Genome Project Panel is a Comprehensive Targeted Genomics Panel for Molecular Profiling of Patients with Multiple Myeloma
Source: PubMed Central journal article supplement — Clin Cancer Res. 2022 May 6;28(13):2854–64. doi: 10.1158/1078-0432.CCR-21-3695 (PMC9250632; doi:10.1158/1078-0432.ccr-21-3695), 2022-05-06
Supplement: NIHMS1808009-supplement-18.pdf [file NIHMS1808009-supplement-18.pdf]

*Supplementary Table 7: Comparison of Targeted sequencing and WGS copy number data for CKS1B.*

| CKS1B |   | WGS |   |    |    |   |
|-------|---|-----|---|----|----|---|
|       |   | 0   | 1 | 2  | 3  | 4 |
| Panel | 0 |     |   |    |    |   |
|       | 1 |     |   |    |    |   |
|       | 2 |     |   | 68 | 1  |   |
|       | 3 |     |   | 1  | 34 | 1 |
|       | 4 |     |   |    | 1  | 7 |

| CKS1B |          | WGS  |          |
|-------|----------|------|----------|
|       |          | Gain | Not Gain |
| Panel | Gain     | 46   | 1        |
|       | Not Gain | 1    | 68       |
