# Supplementary material for: Myeloma Genome Project Panel is a Comprehensive Targeted Genomics Panel for Molecular Profiling of Patients with Multiple Myeloma
Source: PubMed Central journal article supplement — Clin Cancer Res. 2022 May 6;28(13):2854–64. doi: 10.1158/1078-0432.CCR-21-3695 (PMC9250632; doi:10.1158/1078-0432.ccr-21-3695), 2022-05-06
Supplement: NIHMS1808009-supplement-19.pdf [file NIHMS1808009-supplement-19.pdf]

*Supplementary Table 8: Comparison of Targeted sequencing and WGS copy number data for RB1.*

| RB1   |   | WGS |    |    |   |   |
|-------|---|-----|----|----|---|---|
|       |   | 0   | 1  | 2  | 3 | 4 |
| Panel | 0 | 1   | 3  |    |   |   |
|       | 1 |     | 51 |    |   |   |
|       | 2 |     |    | 56 |   |   |
|       | 3 |     |    |    | 2 |   |
|       | 4 |     |    |    |   |   |

| RB1   |              | WGS      |              |
|-------|--------------|----------|--------------|
|       |              | Deletion | Not Deletion |
| Panel | Deletion     | 55       | 0            |
|       | Not Deletion | 0        | 58           |
