# Supplementary material for: Myeloma Genome Project Panel is a Comprehensive Targeted Genomics Panel for Molecular Profiling of Patients with Multiple Myeloma
Source: PubMed Central journal article supplement — Clin Cancer Res. 2022 May 6;28(13):2854–64. doi: 10.1158/1078-0432.CCR-21-3695 (PMC9250632; doi:10.1158/1078-0432.ccr-21-3695), 2022-05-06

Supplementary Table 9: Comparison of Targeted sequencing and WGS copy number data for TP53.

| TP53  |   | WGS |    |    |   |   |
|-------|---|-----|----|----|---|---|
|       |   | 0   | 1  | 2  | 3 | 4 |
| Panel | 0 | 1   | 2* |    |   |   |
|       | 1 |     | 18 | 1  |   |   |
|       | 2 |     |    | 91 |   |   |
|       | 3 |     |    |    |   |   |
|       | 4 |     |    |    |   |   |

| TP53  |              | WGS      |              |
|-------|--------------|----------|--------------|
|       |              | Deletion | Not Deletion |
| Panel | Deletion     | 21       | 1            |
|       | Not Deletion | 0        | 91           |

\*example of sample detected as homozygous deletion by panel and single deletion by WGS

Hg19 view of chromosome 17 with homozygous deletion of TP53 circled in red.

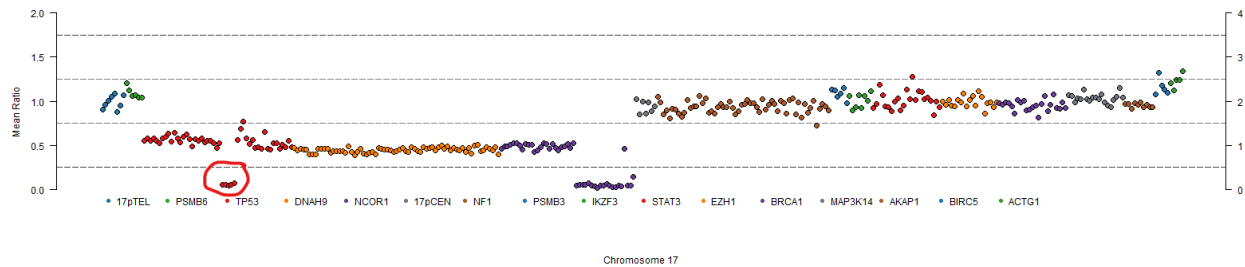

Hg19 view of targeted sequencing data from tumor (top) and saliva (bottom) showing the homozygous deletion in TP53.

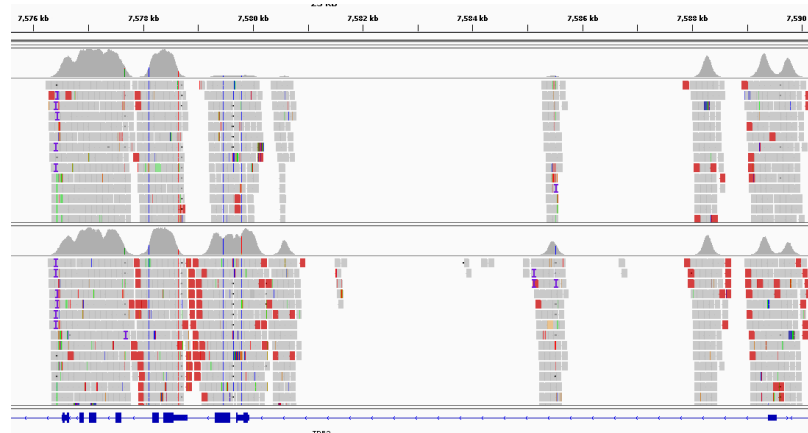

AscatNGS copy number plot generated from WGS data. Only a hemizygous deletion of 17p is seen, which was confirmed in the copy number segment file.

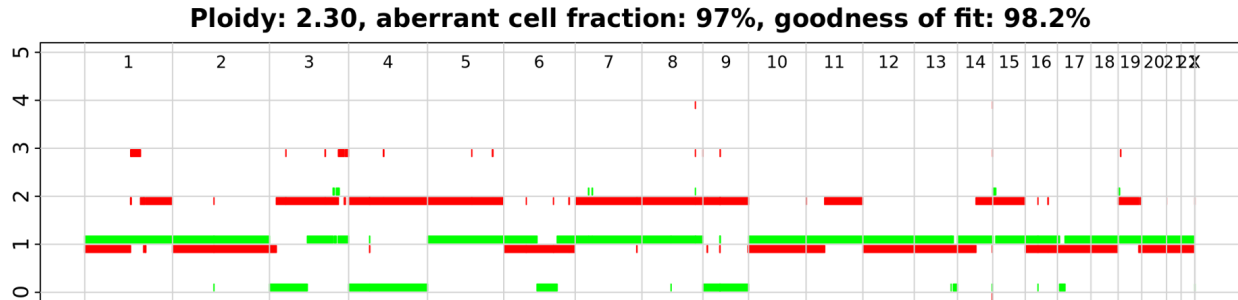

Hg38 view of WGS from tumor (top) and saliva (bottom) DNA, showing the homozygous deletion in TP53 which was not called by AscatNGS. Note: this deletion event was detected by Manta.

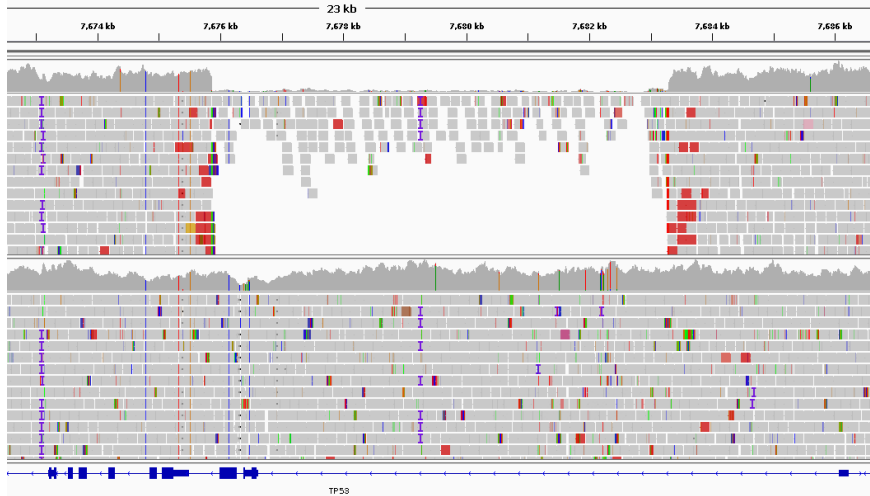

Supplement: NIHMS1808009-supplement-20.pdf [file NIHMS1808009-supplement-20.pdf]
