# Supplementary material for: Myeloma Genome Project Panel is a Comprehensive Targeted Genomics Panel for Molecular Profiling of Patients with Multiple Myeloma
Source: PubMed Central journal article supplement — Clin Cancer Res. 2022 May 6;28(13):2854–64. doi: 10.1158/1078-0432.CCR-21-3695 (PMC9250632; doi:10.1158/1078-0432.ccr-21-3695), 2022-05-06
Supplement: NIHMS1808009-supplement-21.pdf [file NIHMS1808009-supplement-21.pdf]

*Supplementary Table 10: Comparison of Targeted sequencing and WGS copy number data for the combined regions CDKN2C, CKS1B, RB1, and TP53.*

| <i>ALL CNV</i> |          | WGS      |        |
|----------------|----------|----------|--------|
|                |          | Abnormal | Normal |
| Panel          | Abnormal | 133      | 2      |
|                | Normal   | 1        | 319    |
