# Supplementary material for: Myeloma Genome Project Panel is a Comprehensive Targeted Genomics Panel for Molecular Profiling of Patients with Multiple Myeloma
Source: PubMed Central journal article supplement — Clin Cancer Res. 2022 May 6;28(13):2854–64. doi: 10.1158/1078-0432.CCR-21-3695 (PMC9250632; doi:10.1158/1078-0432.ccr-21-3695), 2022-05-06
Supplement: NIHMS1808009-supplement-22.pdf [file NIHMS1808009-supplement-22.pdf]

*Supplementary Table 11: Comparison of Targeted sequencing and FISH detection of IGH translocations.*

| IGH translocations |              | FISH    |         |          |          |          |              |            |
|--------------------|--------------|---------|---------|----------|----------|----------|--------------|------------|
|                    |              | t(4;14) | t(6;14) | t(11;14) | t(14;16) | t(14;20) | Not Detected | Rearranged |
| Panel              | t(4;14)      | 16      |         |          |          |          | 1            |            |
|                    | t(6;14)      |         |         |          |          |          |              | 1          |
|                    | t(11;14)     |         |         | 35       |          |          | 2            | 1          |
|                    | t(14;16)     |         |         |          | 3        |          |              |            |
|                    | t(14;20)     |         |         |          |          |          | 1            |            |
|                    | Not Detected | 1       |         |          |          |          |              | 29         |

\*= 1 of these is a IGH-MYC which was detected by the panel

| t(4;14) |       | FISH |       |
|---------|-------|------|-------|
|         |       | 4    | Not 4 |
| Panel   | 4     | 16   | 1     |
|         | Not 4 | 1    | 74    |

| t(6;14) |       | FISH |       |
|---------|-------|------|-------|
|         |       | 6    | Not 6 |
| Panel   | 6     | 0    | 1     |
|         | Not 6 | 0    | 91    |

| t(11;14) |        | FISH |        |
|----------|--------|------|--------|
|          |        | 11   | Not 11 |
| Panel    | 11     | 35   | 3      |
|          | Not 11 | 0    | 54     |

| $t(14;16)$ |        | FISH |        |
|------------|--------|------|--------|
|            |        | 16   | Not 16 |
| Panel      | 16     | 3    | 0      |
|            | Not 16 | 0    | 89     |

| $t(14;20)$ |        | FISH |        |
|------------|--------|------|--------|
|            |        | 20   | Not 20 |
| Panel      | 20     | 0    | 1      |
|            | Not 20 | 0    | 91     |

| ALL Tx |        | FISH |        |
|--------|--------|------|--------|
|        |        | tx   | Not tx |
| Panel  | tx     | 56   | 4      |
|        | Not tx | 3    | 29     |
