# Supplementary figures and images for: Myeloma Genome Project Panel is a Comprehensive Targeted Genomics Panel for Molecular Profiling of Patients with Multiple Myeloma
Source: PubMed Central journal article supplement — Clin Cancer Res. 2022 May 6;28(13):2854–64. doi: 10.1158/1078-0432.CCR-21-3695 (PMC9250632; doi:10.1158/1078-0432.ccr-21-3695), 2022-05-06

**Supplementary Figure 9.** Gain of 11q associated with the *t*(11;14) centromeric of *CCND1*.

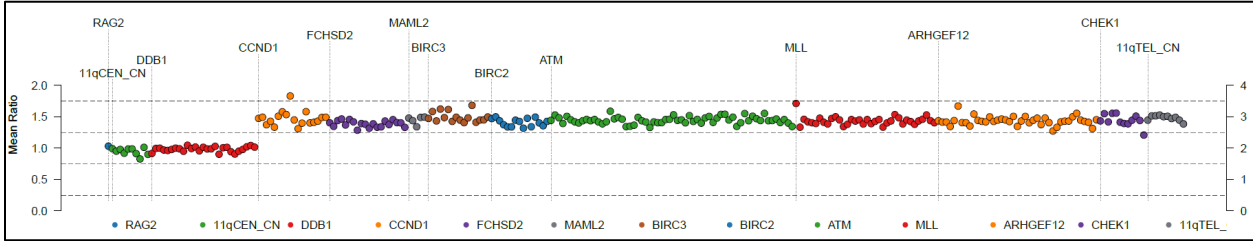

Supplement: NIHMS1808009-supplement-10.pdf [file NIHMS1808009-supplement-10.pdf]
